# Supplementary material for: The Critical Assessment of Oxidative Stress Parameters as Potential Biomarkers of Carbon Monoxide Poisoning
Source: MDPI journal article supplement (doi:10.3390/ijms241310784), 2023-06-28
Supplement: s1 [file s1]

**Table S1.** Characteristics of research participants.

| Patients number | Age | Gender (F/M) | Pach scale       | Patients number | Age | Gender (F/M) | Pach scale       | Patients number | Age | Gender (F/M) | Pach scale       |
|-----------------|-----|--------------|------------------|-----------------|-----|--------------|------------------|-----------------|-----|--------------|------------------|
| 1               | 56  | F            | Control          | 29              | 47  | M            | II <sup>o</sup>  | 57              | 37  | F            | Control          |
| 2               | 32  | M            | I <sup>o</sup>   | 30              | 68  | M            | III <sup>o</sup> | 58              | 62  | F            | III <sup>o</sup> |
| 3               | 55  | F            | III <sup>o</sup> | 31              | 51  | M            | II <sup>o</sup>  | 59              | 23  | F            | II <sup>o</sup>  |
| 4               | 65  | F            | III <sup>o</sup> | 32              | 23  | M            | I <sup>o</sup>   | 60              | 41  | M            | II <sup>o</sup>  |
| 5               | 24  | F            | I <sup>o</sup>   | 33              | 55  | F            | III <sup>o</sup> | 61              | 52  | M            | III <sup>o</sup> |
| 6               | 38  | F            | Control          | 34              | 26  | M            | I <sup>o</sup>   | 62              | 23  | M            | I <sup>o</sup>   |
| 7               | 19  | F            | II <sup>o</sup>  | 35              | 29  | F            | I <sup>o</sup>   | 63              | 63  | M            | Control          |
| 8               | 29  | M            | II <sup>o</sup>  | 36              | 47  | F            | II <sup>o</sup>  | 64              | 30  | M            | II <sup>o</sup>  |
| 9               | 31  | M            | II <sup>o</sup>  | 37              | 40  | M            | II <sup>o</sup>  | 65              | 28  | F            | I <sup>o</sup>   |
| 10              | 28  | F            | I <sup>o</sup>   | 38              | 68  | M            | III <sup>o</sup> | 66              | 24  | F            | I <sup>o</sup>   |
| 11              | 69  | F            | III <sup>o</sup> | 39              | 54  | F            | Control          | 67              | 41  | F            | II <sup>o</sup>  |
| 12              | 56  | M            | Control          | 40              | 36  | F            | I <sup>o</sup>   | 68              | 28  | M            | I <sup>o</sup>   |
| 13              | 67  | F            | III <sup>o</sup> | 41              | 53  | M            | III <sup>o</sup> | 69              | 68  | F            | III <sup>o</sup> |
| 14              | 42  | M            | Control          | 42              | 34  | F            | II <sup>o</sup>  | 70              | 31  | M            | Control          |
| 15              | 61  | F            | III <sup>o</sup> | 43              | 50  | M            | III <sup>o</sup> | 71              | 47  | F            | II <sup>o</sup>  |
| 16              | 44  | M            | II <sup>o</sup>  | 44              | 41  | M            | II <sup>o</sup>  | 72              | 52  | F            | III <sup>o</sup> |
| 17              | 29  | M            | I <sup>o</sup>   | 45              | 50  | F            | II <sup>o</sup>  | 73              | 24  | F            | I <sup>o</sup>   |
| 18              | 58  | M            | III <sup>o</sup> | 46              | 56  | F            | III <sup>o</sup> | 74              | 69  | M            | III <sup>o</sup> |
| 19              | 61  | F            | III <sup>o</sup> | 47              | 19  | M            | I <sup>o</sup>   | 75              | 46  | M            | II <sup>o</sup>  |
| 20              | 31  | M            | I <sup>o</sup>   | 48              | 41  | F            | Control          | 76              | 25  | F            | I <sup>o</sup>   |
| 21              | 55  | F            | II <sup>o</sup>  | 49              | 39  | M            | II <sup>o</sup>  | 77              | 58  | M            | Control          |
| 22              | 45  | F            | II <sup>o</sup>  | 50              | 55  | M            | III <sup>o</sup> | 78              | 58  | F            | III <sup>o</sup> |
| 23              | 40  | M            | II <sup>o</sup>  | 51              | 32  | M            | Control          | 79              | 46  | F            | II <sup>o</sup>  |
| 24              | 36  | F            | I <sup>o</sup>   | 52              | 61  | F            | III <sup>o</sup> | 80              | 24  | F            | I <sup>o</sup>   |
| 25              | 45  | F            | II <sup>o</sup>  | 53              | 25  | F            | I <sup>o</sup>   | 81              | 27  | M            | I <sup>o</sup>   |
| 26              | 43  | M            | II <sup>o</sup>  | 54              | 47  | M            | II <sup>o</sup>  | 82              | 33  | M            | II <sup>o</sup>  |
| 27              | 47  | F            | Control          | 55              | 29  | F            | II <sup>o</sup>  |                 |     |              |                  |
| 28              | 59  | M            | II <sup>o</sup>  | 56              | 46  | M            | II <sup>o</sup>  |                 |     |              |                  |
